# Supplementary material for: Proteomic Profiling and Rhizosphere-Associated Microbial Communities Reveal Adaptive Mechanisms of Dioclea apurensis Kunth in Eastern Amazon’s Rehabilitating Minelands
Source: MDPI journal article supplement (doi:10.3390/plants11050712), 2022-03-07
Supplement: s1 [file s1]

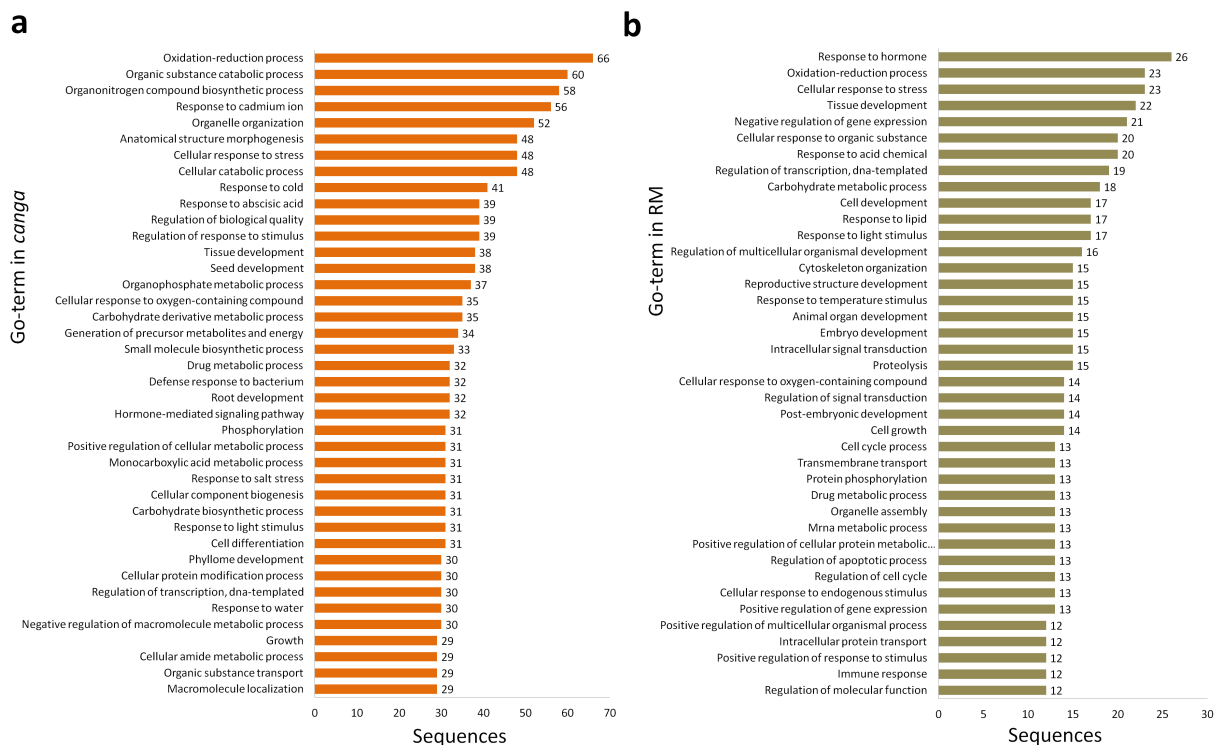

**Figure S1.** Top 40 categories obtained by functional annotation in different biological processes. (a) Most abundant proteins in *canga* plants and (b) the most abundant proteins in rehabilitating minelands (RM) plants.

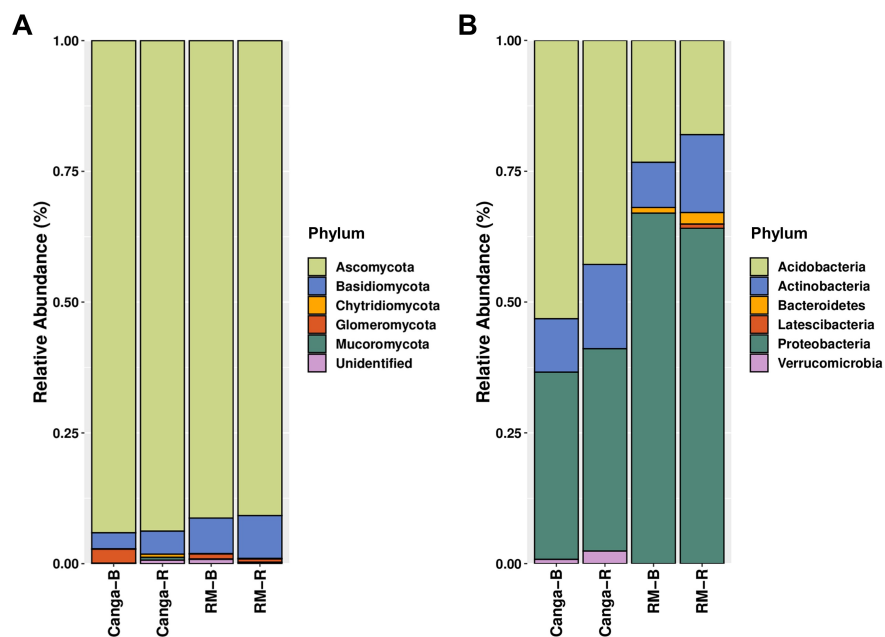

**Figure S2.** Relative abundance at the phylum level of major fungal (A) and bacterial (B) sequences associated with the rhizosphere (R) or bulk soil (B) of *Dioclea apurensis* growing in *canga* (*canga*) or a rehabilitating mineland (RM) in Serra dos Carajás, eastern Amazon (n = 4).

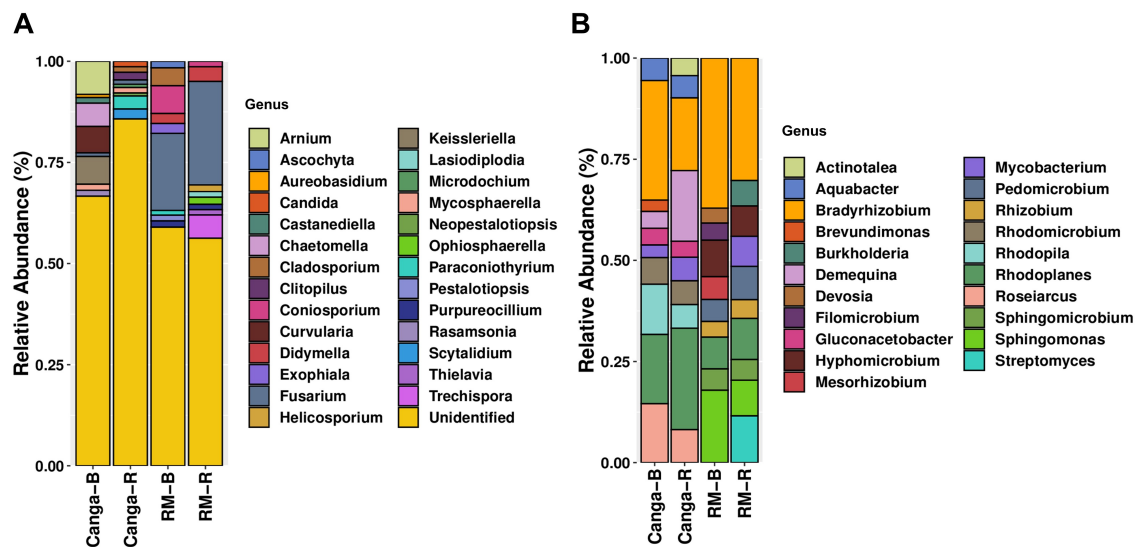

**Figure S3.** Relative abundance at the genus level of major fungal (A) and bacterial (B) sequences associated with the rhizosphere (R) or bulk soil (B) of *Dioclea apurensis* growing in *canga* (*canga*) or a rehabilitating mineland (RM) in Serra dos Carajás, eastern Amazon (n = 4).

**Table S1.** Fungal 18S rRNA sequences obtained in rhizospheric and bulk substrates samples from *Dioclea apurensis* growing in *canga* (*canga*) or rehabilitating minelands (RM).

|                          | Sample site  | Soil source | Sample ID | Total reads | Read after filtering | Number of OTU |
|--------------------------|--------------|-------------|-----------|-------------|----------------------|---------------|
| <i>Dioclea apurensis</i> | <i>Canga</i> | Rhizosphere | canga_R1  | 210743      | 158066               | 498           |
|                          |              |             | canga_R2  | 255066      | 195836               | 780           |
|                          |              |             | canga_R3  | 188252      | 145171               | 494           |
|                          |              |             | canga_R4  | 233956      | 192757               | 619           |
|                          |              | Bulk        | canga_B1  | 277357      | 208045               | 558           |
|                          |              |             | canga_B2  | 231010      | 167332               | 431           |
|                          |              |             | canga_B3  | 244945      | 171656               | 359           |
|                          |              |             | canga_B4  | 233956      | 165882               | 430           |
|                          | RM           | Rhizosphere | RM_R1     | 205278      | 231358               | 622           |
|                          |              |             | RM_R2     | 266446      | 249923               | 707           |
|                          |              |             | RM_R3     | 167759      | 197067               | 789           |
|                          |              |             | RM_R4     | 185793      | 161247               | 563           |
|                          |              | Bulk        | RM_B1     | 306229      | 169977               | 511           |
|                          |              |             | RM_B2     | 310015      | 103815               | 538           |
|                          |              |             | RM_B3     | 327132      | 119698               | 520           |
|                          |              |             | RM_B4     | 304895      | 122836               | 591           |

**Table S2.** Bacterial 16S rRNA sequences obtained in rhizospheric and bulk substrates samples from *Dioclea apurensis* growing in *canga* (*canga*) or rehabilitating minelands (RM).

|                          | Sample site  | Soil source | Sample ID | Total reads | Read after filtering | Number of OTU |
|--------------------------|--------------|-------------|-----------|-------------|----------------------|---------------|
| <i>Dioclea apurensis</i> | <i>Canga</i> | Rhizosphere | canga_R1  | 183728      | 87553                | 559           |
|                          |              |             | canga_R2  | 155461      | 65746                | 590           |
|                          |              |             | canga_R3  | 699536      | 234396               | 632           |
|                          |              |             | canga_R4  | 295895      | 138631               | 650           |
|                          |              | Bulk        | canga_B1  | 158454      | 9975                 | 339           |
|                          |              |             | canga_B2  | 105497      | 9128                 | 225           |
|                          |              |             | canga_B3  | 140640      | 18183                | 205           |
|                          |              |             | canga_B4  | 232601      | 29125                | 281           |
|                          | RM           | Rhizosphere | RM_R1     | 577622      | 29185                | 605           |
|                          |              |             | RM_R2     | 310612      | 17404                | 477           |
|                          |              |             | RM_R3     | 427487      | 23526                | 499           |
|                          |              |             | RM_R4     | 313837      | 14678                | 441           |
|                          |              | Bulk        | RM_B1     | 168299      | 215278               | 980           |
|                          |              |             | RM_B2     | 110910      | 242902               | 996           |
|                          |              |             | RM_B3     | 188221      | 112731               | 901           |
|                          |              |             | RM_B4     | 139459      | 113418               | 888           |

**Table S3.** Most abundant fungal and bacterial taxa identified in *Dioclea apurensis* soil substrates in plants from *canga* (*canga*) and rehabilitating minelands (RM). Numbers between parentheses are the relative abundance percentage (RA %) of each identified taxa.

| Identification Source |              | Identified Phyla (RA %)                                                                                                                                                                  | Identified Genera (RA %)                                                                                                                                                                                                                                                                      |
|-----------------------|--------------|------------------------------------------------------------------------------------------------------------------------------------------------------------------------------------------|-----------------------------------------------------------------------------------------------------------------------------------------------------------------------------------------------------------------------------------------------------------------------------------------------|
| Fungi                 | <i>Canga</i> | <i>Rhizosphere</i><br>Ascomycota (93.80);<br>Basidiomycota (4.40);<br>Unidentified (0.67);<br>Chytridiomycota (0.59);<br>Mucoromycota (0.54)                                             | Unidentified (77.30); <i>Paraconiothyrium</i> (2.90); <i>Scytalidium</i> (2.20); <i>Clitopilus</i> (1.7); <i>Mycosphaerella</i> (1.25); <i>Cladosporium</i> (1.24); <i>Candida</i> (1.20); <i>Fusarium</i> (0.97); <i>Microdochium</i> (0.71); <i>Neopestalotiopsis</i> (0.65)                |
|                       |              | <i>Bulk</i><br>Ascomycota (94.10);<br>Basidiomycota (3.10);<br>Glomeromycota (2.69);<br>Unidentified (0.09);<br>Chytridiomycota (0.02)                                                   | Unidentified (61.90); <i>Arnium</i> (7.60); <i>Keissleriella</i> (6.40); <i>Curvularia</i> (6.10); <i>Chaetomella</i> (5.33); <i>Mycosphaerella</i> (1.38); <i>Rasamsonia</i> (1.35); <i>Castanediella</i> (1.29); <i>Fusarium</i> (0.80); <i>Aureobasidium</i> (0.70)                        |
|                       | RM           | <i>Rhizosphere</i><br>Ascomycota (90.80);<br>Basidiomycota (8.20);<br>Glomeromycota (0.66);<br>Unidentified (0.25);<br>Chytridiomycota (0.09)                                            | Unidentified (49.90); <i>Fusarium</i> (22.70); <i>Trechispora</i> (5.10); <i>Didymella</i> (3.20); <i>Ophiosphaerella</i> (1.58); <i>Helicospirium</i> (1.45); <i>Lasiodiplodia</i> (1.22); <i>Purpureocillium</i> (1.17); <i>Coniosporium</i> (1.13); <i>Thielavia</i> (1.2)                 |
|                       |              | <i>Bulk</i><br>Ascomycota (91.30);<br>Basidiomycota (6.82);<br>Glomeromycota (1.0);<br>Unidentified (0.83);<br>Mucoromycota (0.04);<br>Chytridiomycota (0.01)                            | Unidentified (52.40); <i>Fusarium</i> (16.90); <i>Coniosporium</i> (6.00); <i>Cladosporium</i> (3.92); <i>Didymella</i> (2.21); <i>Exophiala</i> (2.17); <i>Ascochyta</i> (1.41); <i>Purpureocillium</i> (1.36); <i>Pestalotiopsis</i> (1.27); <i>Paraconiothyrium</i> (1.02)                 |
| Bacteria              | <i>Canga</i> | <i>Rhizosphere</i><br>Acidobacteria (42.80);<br>Proteobacteria (38.70);<br>Actinobacteria (16.10);<br>Verrucomicrobia (2.40)                                                             | <i>Rhodoplanes</i> (20.00); <i>Bradyrhizobium</i> (14.40); <i>Demequina</i> (13.90); <i>Roseiarcus</i> (6.54); <i>Rhodomicrobium</i> (4.74); <i>Mycobacterium</i> (4.67); <i>Rhodopila</i> (4.66); <i>Aquabacter</i> (4.38); <i>Actinotalea</i> (3.47); <i>Gluconacetobacter</i> (3.17)       |
|                       |              | <i>Bulk</i><br>Acidobacteria (53.20);<br>Proteobacteria (35.80);<br>Actinobacteria (10.20);<br>Verrucomicrobia (0.80)                                                                    | <i>Bradyrhizobium</i> (24.30); <i>Rhodoplanes</i> (14.00); <i>Roseiarcus</i> (11.90); <i>Rhodopila</i> (10.20); <i>Rhodomicrobium</i> (5.42); <i>Aquabacter</i> (4.57); <i>Demequina</i> (3.44); <i>Gluconacetobacter</i> (3.42); <i>Mycobacterium</i> (2.54); <i>Brevundimonas</i> (2.29)    |
|                       | RM           | <i>Rhizosphere</i><br><i>Proteobacteria</i> (64.10);<br><i>Acidobacteria</i> (18.00);<br><i>Actinobacteria</i> (14.90);<br><i>Bacteroidetes</i> (2.20);<br><i>Latescibacteria</i> (0.80) | <i>Bradyrhizobium</i> (14.50); <i>Streptomyces</i> (5.50); <i>Rhodoplanes</i> (4.80); <i>Sphingomonas</i> (4.20); <i>Pedomicrobium</i> (3.95); <i>Hyphomicrobium</i> (3.61); <i>Mycobacterium</i> (3.55); <i>Burkholderia</i> (3.01); <i>Sphingomicrobium</i> (2.44); <i>Rhizobium</i> (2.30) |
|                       |              | <i>Bulk</i><br><i>Proteobacteria</i> (67.00);<br><i>Acidobacteria</i> (23.30);<br><i>Actinobacteria</i> (8.63);<br><i>Bacteroidetes</i> (1.07)                                           | <i>Bradyrhizobium</i> (18.50); <i>Sphingomonas</i> (12.00); <i>Hyphomicrobium</i> (6.00); <i>Rhodoplanes</i> (5.30); <i>Mesorhizobium</i> (3.81); <i>Pedomicrobium</i> (3.68); <i>Sphingomicrobium</i> (3.55); <i>Filomicrobium</i> (2.86); <i>Rhizobium</i> (2.61); <i>Devosia</i> (2.48)    |

**Table S4.** Steps and procedures of protein extraction.

| Steps | Procedure                                                                                                                                                                                                                                                                                                                                     |
|-------|-----------------------------------------------------------------------------------------------------------------------------------------------------------------------------------------------------------------------------------------------------------------------------------------------------------------------------------------------|
| 1     | The roots of five plants were mixed for each condition and the material was macerated in liquid nitrogen. Were using about 300 mg of macerated roots.                                                                                                                                                                                         |
| 2     | In each sample were added 10 mL of buffer containing sucrose (1.5 M), Tris-Hydrochloride (1M, pH 8), sodium dodecyl sulfate (SDS, 10%), Phenylmethysulfonyl fluoride (PMSF, 100 mM), polyvinylpolypyrrolidone (PVPP), ultrapure water with addition of 100 $\mu$ L of protease inhibitor (SIGMA) and 500 $\mu$ L of $\beta$ -mercaptoethanol. |
| 3     | The samples were sonicated for five repetitions of 30 seconds at room temperature.                                                                                                                                                                                                                                                            |
| 4     | The extracts were divided in ten microtubules each, followed by the addition of 700 $\mu$ L of phenol per microtubule. The samples were vortexed by 15 minutes and centrifuged during 8 minutes at 14000 rpm, for the phenolic phase separation.                                                                                              |
| 5     | The phenolic content was transferred to new microtubule and the operation repeated to eliminate the any residue of aqueous phase or SDS.                                                                                                                                                                                                      |
| 6     | There were added 1300 $\mu$ L of ammonia acetate (100 mM) in methanol (100%) for protein precipitation during 24 hours at -80 $^{\circ}$ C.                                                                                                                                                                                                   |
| 7     | Centrifugation at 14000 rpm during 8 minutes, and the supernatant was discarded. The precipitate was transferred to a new microtubule and washed four times with acetone 80%.                                                                                                                                                                 |
| 8     | The last washing was made with ethanol 70% and the precipitate dried at room temperature in vacuum concentrator around seven minutes.                                                                                                                                                                                                         |
| 9     | The extracts were solubilized in 200 $\mu$ L of RapiGest (Waters, Milford, MA, USA) 0,2%.                                                                                                                                                                                                                                                     |
